# Supplementary material for: Knockdown of miR-128a induces Lin28a expression and reverts myeloid differentiation blockage in acute myeloid leukemia
Source: PubMed Central journal article supplement (PMC5520910; doi:10.1038/cddis.2017.253), 2017-06-01
Supplement: cddis2017253x6.pdf [file cddis2017253x6.pdf]

**Supplementary table 1: Clinical-biological features of AML patients**

| UPN | % blasts in BM | WHO Classification                   | Mutation status                       | Cytogenetics                                          | <i>Lin28A</i> expression | <i>miR-128a</i> expression |
|-----|----------------|--------------------------------------|---------------------------------------|-------------------------------------------------------|--------------------------|----------------------------|
| 1   | 90             | APL                                  | PML/RAR $\alpha$                      | 46,XY,t(15;17)(q24;q21),der(3)t(3;?)or add(3)(q?)[20] | 0.000103721              | 0.181                      |
| 2   | 90             | Acute myelomonocytic leukemia        | WT1(+)<br>FLT3(+)                     | Normal                                                | 0.000468                 | 0.025                      |
| 3   | 75             | AML with maturation                  | WT1(+)<br>FLT3(+)                     | Complex karyotype                                     | 0.000114                 | 0.027                      |
| 4   | 97             | Not specified                        | WT1(+)                                | 46,X?,inv(16)(p13q22)                                 | 0.003940                 | 0.008                      |
| 5   | 90             | Not specified                        | WT1(+)<br>NPM1(+)<br>FLT3(+)          | Not available                                         | 0.0477                   | 0.033146492                |
| 6   | 100            | Not specified                        | WT1(+)<br>FLT3(+)<br>MLL(+)           | Not available                                         | 0.002420                 |                            |
| 7   | 85             | Not specified                        | WT1(+)<br>NPM1(+)                     | Not available                                         | 0.002230                 | 0.047530586                |
| 8   | 90             | Not specified                        | WT1(+)<br>FLT3(+)                     | Not available                                         |                          | 0.014477938                |
| 9   | 100            | APL                                  | WT1(+)<br>PML/RAR $\alpha$            | 46,XY,t(15;17)(q24;q21)                               | 0.003880                 | 0.060162153                |
| 10  | 100            | APL                                  | WT1(+)<br>PML/RAR $\alpha$<br>FLT3(+) | 46,XX,t(15;17)(q24;q21)                               | 0.003360                 | 0.129408115                |
| 11  | 85             |                                      |                                       |                                                       | 0.000324                 | 0.022405551                |
| 12  | 80             | Acute myelomonocytic leukemia        | WT1(+)<br>NPM1(+)<br>FLT3(+)          | Not available                                         | 0.001350                 | 0.010273                   |
| 13  | 98             |                                      |                                       |                                                       |                          | 0.01132                    |
| 14  | 60             | Acute monoblastic/monocytic leukemia | WT1(+)                                | Not available                                         | 0.001540                 | 0.014                      |
| 15  | 97             | AML with maturation                  | WT1(+)<br>NPM1(+)                     | Not available                                         | 0.001630                 | 0.013                      |
| 16  | 90             | Secondary AML                        |                                       | Not available                                         | 0.001790                 | 0.01589812                 |
| 17  | 90             |                                      |                                       | Not available                                         | 0.014400                 | 0.008912217                |
| 18  | 90             | AML with maturation                  | WT1(+)                                | Not available                                         | 0.009300                 | 0.018198962                |
| 19  | 70             | Secondary AML                        | WT1(+)                                | Complex karyotype                                     | 0.000146                 | 0.081899588                |
| 20  | 81             | AML without maturation               | WT1(+)<br>NPM1(+)<br>FLT3(+)          | Not available                                         | 0.000459                 |                            |
| 21  | 80             | AML without maturation               | WT1(+)                                | 46,XY,t(9;11)                                         | 0.00248                  | 0.01                       |
| 22  | 98             | AML with minimal                     | NPM1(+)                               | Normal                                                | 0.000564                 |                            |

|    |       | differentiation                      |                 |                                     |             |             |
|----|-------|--------------------------------------|-----------------|-------------------------------------|-------------|-------------|
| 23 | 82    | AML without maturation               |                 | Normal                              | 0.0015      | 0.011       |
| 24 | 90    | Acute myelomonocytic leukemia        |                 | Not available                       | 0.0295      | 0.018000    |
| 25 | 95    | Acute monoblastic/monocytic leukemia | WT1(+)          | 46,XX,inv(16)(p13q22),t(X;5)(q?:q?) | 0.011       | 0.046000    |
| 26 | 90    | AML without maturation               |                 | Normal                              | 0.0008      |             |
| 27 | 70-80 | Acute myelomonocytic leukemia        | WT1(+)          | Not available                       | 0.0004      |             |
| 28 | 60-70 | Acute myelomonocytic leukemia        | WT1(+)          | Normal                              | 0.000429    | 0.018       |
| 29 | 80    | Acute myelomonocytic leukemia        |                 | Not available                       | 0.000614    | 0.01        |
| 30 | 90    | AML with minimal differentiation     | WT1(+)          | Not available                       | 0.000573    | 0.01        |
| 31 | 80    | AML without maturation               | NPM1(+)         | Normal                              | 0.000533    | 0.012       |
| 32 | 95    | Acute myelomonocytic leukemia        | FLT3(+)         | Not available                       | 0.00122     | 0.021       |
| 33 | 70    | AML without maturation               | WT1(+)          | 45,XY,-7[?]                         | 0.000887    | 0.014       |
| 34 | 70    | Acute myelomonocytic leukemia        | WT1(+)          | Complex karyotype                   | 0.00139     | 0.013       |
| 35 | 80    | AML without maturation               | NPM1(+)         |                                     | 0.000573    | 0.011       |
| 36 | 90    | Acute myelomonocytic leukemia        | WT1(+)          | Not available                       | 0.000188    | 0.014477938 |
| 37 | 69    | Secondary AML                        | WT1(+)          | Not available                       | 0.000821188 | 0.017579039 |
| 38 | 90    | Acute myelomonocytic leukemia        | WT1(+)          | Complex karyotype                   | 0.000143168 | 0.01        |
| 39 | 76    | AML without maturation               | WT1(+); NPM1(+) | Normal                              | 0.010380358 | 0.022       |
| 40 | 65    | AML without maturation               | WT1(+)          | 46,XY,del(9)(q21)[20]               | 0.000171441 | 0.068       |

UPN, unique patient number; BM, bone marrow; APL, acute promyelocytic leukemia; AML, acute myeloid leukemia.
